# Supplementary material for: Deepening biomedical research training: Community-Building Wellness Workshops for Post-Baccalaureate Research Education Program (PREP) Trainees
Source: PubMed Central journal article supplement — bioRxiv. 2024 Mar 13:2024.03.10.584300. Preprint. [Version 1] doi: 10.1101/2024.03.10.584300 (PMC10979910; doi:10.1101/2024.03.10.584300), 2024-03-13
Supplement: media-10.pdf [file media-10.pdf]

# Courageous Conversations Reflection Worksheet

## What are Our Stories?

|                                                                     |                                                                     |
|---------------------------------------------------------------------|---------------------------------------------------------------------|
| <b>My Story</b><br>What is the problem/issue from my point of view? | <b>Their Story</b><br>What is the problem from their point of view? |
|---------------------------------------------------------------------|---------------------------------------------------------------------|

## Our Contributions

|                                                                            |                                                                                  |
|----------------------------------------------------------------------------|----------------------------------------------------------------------------------|
| <b>My Contribution</b><br>How have I contributed to the current situation? | <b>Their Contribution</b><br>How have they contributed to the current situation? |
| <b>Impact</b><br>What impact might this situation have had on them?        | <b>Impact</b><br>What impact has this situation had on me?                       |

## Feelings at Play?

|                                                                  |                                                              |
|------------------------------------------------------------------|--------------------------------------------------------------|
| <b>My Feelings</b><br>How do I feel about the situation and why? | <b>Their Feelings</b><br>What might they be feeling?<br>Why? |
|------------------------------------------------------------------|--------------------------------------------------------------|

## Identity

|                                                                      |                                                                                                     |
|----------------------------------------------------------------------|-----------------------------------------------------------------------------------------------------|
| <b>My Self Image</b><br>What do I fear this situation says about me? | <b>Their Self Image</b><br>What might the situation say about them that would be upsetting to them? |
|----------------------------------------------------------------------|-----------------------------------------------------------------------------------------------------|

**What I don't want from this conversation**

**What I do want from this conversation**
